# Supplementary material for: Effects of morality and reputation on sharing behaviors in human-robot teams
Source: Front Psychol. 2023 Dec 8;14:1280127. doi: 10.3389/fpsyg.2023.1280127 (PMC10739295; doi:10.3389/fpsyg.2023.1280127)
Supplement: Supplementary file 1 [file Table_1.xlsx]

## Sheet: Data
Number	Gender	Age	Education	Major	Moral constraint	Agent type	Sharing behaviors	Reputation concern	Perceived morality Scale score	Moral identity score	Moral empathy scale score	People think well of this person.	People like being with me.	Many show interest in me.	People look up to me.	Many people like to associate with me.	I am fun to be with.	I am regarded highly by others.	I am seen as a person of high integrity.	People feel they can trust me.	I am considered a man of high moral character.	People think I do things on moral principles.	I am regarded as a serious person who gets things done.	I'm supposed to do the right thing.	I'm supposed to be fair in most situations.	When others are in trouble, many partners turn to me for help.	Others assume that I will share my success with them.	If people want things done well, they ask me to do them.	I'm accepted by most people.	All in all, my reputation is good.	Whether or not someone suffered emotionally in this situation.	Whether or not someone cared for someone weak or vulnerable in this situation.	Whether or not someone’s action showed love for his or her country in this situation.	Whether or not someone showed a lack of respect for authority in this situation.	Whether or not someone violated standards of purity and decency in this situation.	Whether or not someone was good at math in this situation.	Whether or not someone cared for someone weak or vulnerable in this situation.	Whether or not someone acted unfairly in this situation.	Whether or not someone did something to betray his or her group in this situation.	Whether or not someone conformed to the traditions of society in this situation.	8、这件事是否有人做了令人厌恶的事	Whether or not someone did something disgusting in this situation.	Whether or not someone was cruel in this situation.	Whether or not someone showed a lack of loyalty in this situation.	Whether or not an action caused chaos or disorder in this situation.	Whether or not someone acted in a way that God would approve of in this situation.	Compassion for those who are suffering is the most crucial virtue.	When the government makes laws, the number one principle should be ensuring that everyone is treated fairly.	I am proud of my country’s history.
12	1	18	High School or Technical School	Automation	0	0	30	3	3.53125	3	4.0625	3	3	3	3	3	3	3	3	3	3	3	3	3	3	3	3	3	3	3	3	3	3	3	3	3	3	3	3	3	3	3	3	3	3	3	3	5	5
12	2	18	Bachelor degree or associate degree	Automation	0	0	30	3	3.53125	3	4.0625	3	3	3	3	3	3	3	3	3	3	3	3	3	3	3	3	3	3	3	3	3	3	3	3	3	3	3	3	3	3	3	3	3	3	3	3	5	5
3	1	26	Graduate degree	Chemistry	0	0	50	3.10526	3	2.9375	3.0625	2	3	2	4	2	4	2	4	2	4	2	4	4	3	2	4	4	4	3	2	3	2	4	2	4	2	4	2	4	2	4	2	4	2	4	2	4	2
3	2	26	Bachelor degree or associate degree	Chemistry	0	0	50	3.10526	3	2.9375	3.0625	2	3	2	4	2	4	2	4	2	4	2	4	4	3	2	4	4	4	3	2	3	2	4	2	4	2	4	2	4	2	4	2	4	2	4	2	4	2
3	1	24	Bachelor degree or associate degree	Chemistry	0	0	50	3.10526	3	2.9375	3.0625	2	3	2	4	2	4	2	4	2	4	2	4	4	3	2	4	4	4	3	2	3	2	4	2	4	2	4	2	4	2	4	2	4	2	4	2	4	2
11	1	19	High School or Technical School	Automation	0	0	50	3.31579	3.1875	2.8125	3.5625	3	3	2	4	3	4	2	2	4	3	4	3	4	4	4	4	3	4	3	4	4	2	3	2	3	4	4	2	2	3	2	2	2	2	4	3	3	5
11	2	22	Bachelor degree or associate degree	Automation	0	0	50	3.31579	3.1875	2.8125	3.5625	3	3	2	4	3	4	2	2	4	3	4	3	4	4	4	4	3	4	3	4	4	2	3	2	3	4	4	2	2	3	2	2	2	2	4	3	3	5
6	1	19	High School or Technical School	Network Engineering	0	0	25	3.31579	4	4	4	4	4	3	4	4	4	3	3	4	3	3	2	3	3	3	3	3	4	3	4	4	4	4	4	4	4	4	4	4	4	4	4	4	4	4	4	4	4
6	2	22	Bachelor degree or associate degree	Chemistry	0	0	25	3.31579	4	4	4	4	4	3	4	4	4	3	3	4	3	3	2	3	3	3	3	3	4	3	4	4	4	4	4	4	4	4	4	4	4	4	4	4	4	4	4	4	4
1	2	22	Bachelor degree or associate degree	Accounting	0	0	50	3.63158	4	4	4	4	4	3	3	3	3	3	3	4	3	4	4	4	4	4	4	4	4	4	4	4	4	4	4	4	4	4	4	4	4	4	4	4	4	4	4	4	4
1	2	22	Bachelor degree or associate degree	Chemistry	0	0	50	3.63158	4	4	4	4	4	3	3	3	3	3	3	4	3	4	4	4	4	4	4	4	4	4	4	4	4	4	4	4	4	4	4	4	4	4	4	4	4	4	4	4	4
7	1	19	Bachelor degree or associate degree	Applied statistics	0	0	50	3.89474	2.96875	2.9375	3	4	4	4	4	4	4	3	3	4	4	4	4	4	4	4	4	4	4	4	3	3	1	4	3	3	3	3	3	3	3	3	3	3	3	3	3	3	3
7	2	20	Bachelor degree or associate degree	Chemistry	0	0	50	3.89474	2.96875	2.9375	3	4	4	4	4	4	4	3	3	4	4	4	4	4	4	4	4	4	4	4	3	3	1	4	3	3	3	3	3	3	3	3	3	3	3	3	3	3	3
5	1	19	High School or Technical School	Information Management and System	0	0	25	3.68421	3.09375	2.875	3.3125	4	3	3	3	3	3	4	4	4	4	4	4	4	4	4	3	4	4	4	4	4	3	1	2	1	1	3	1	4	5	5	5	2	4	1	3	3	4
5	2	20	Bachelor degree or associate degree	Chemistry	0	0	25	3.68421	3.09375	2.875	3.3125	4	3	3	3	3	3	4	4	4	4	4	4	4	4	4	3	4	4	4	4	4	3	1	2	1	1	3	1	4	5	5	5	2	4	1	3	3	4
13	1	22	High School or Technical School	Network Engineering	0	0	50	4	4.6875	4.75	4.625	4	4	4	4	4	4	4	4	4	4	4	4	4	4	4	4	4	4	4	4	5	5	5	5	2	5	5	5	5	5	5	5	5	5	5	5	5	5
10	1	18	Bachelor degree or associate degree	Applied Chemistry	0	0	50	4	3.1875	2.25	4.125	4	4	4	4	4	4	4	4	4	4	4	4	4	4	4	4	4	4	4	3	3	1	1	2	1	2	2	1	3	3	3	3	2	2	4	3	5	5
13	2	22	Bachelor degree or associate degree	Chemistry	0	0	50	4	4.6875	4.75	4.625	4	4	4	4	4	4	4	4	4	4	4	4	4	4	4	4	4	4	4	4	5	5	5	5	2	5	5	5	5	5	5	5	5	5	5	5	5	5
10	2	20	Bachelor degree or associate degree	Chemistry	0	0	50	4	3.1875	2.25	4.125	4	4	4	4	4	4	4	4	4	4	4	4	4	4	4	4	4	4	4	3	3	1	1	2	1	2	2	1	3	3	3	3	2	2	4	3	5	5
13	1	22	Bachelor degree or associate degree	Automation	0	0	50	4	4.6875	4.75	4.625	4	4	4	4	4	4	4	4	4	4	4	4	4	4	4	4	4	4	4	4	5	5	5	5	2	5	5	5	5	5	5	5	5	5	5	5	5	5
10	1	20	Bachelor degree or associate degree	Automation	0	0	50	4	3.1875	2.25	4.125	4	4	4	4	4	4	4	4	4	4	4	4	4	4	4	4	4	4	4	3	3	1	1	2	1	2	2	1	3	3	3	3	2	2	4	3	5	5
10	1	20	Bachelor degree or associate degree	Automation	0	0	50	4	3.1875	2.25	4.125	4	4	4	4	4	4	4	4	4	4	4	4	4	4	4	4	4	4	4	3	3	1	1	2	1	2	2	1	3	3	3	3	2	2	4	3	5	5
8	1	18	Bachelor degree or associate degree	Microelectronics Science and Engineering	0	0	10	3.47368	3.25	3	3.5	4	3	3	3	3	3	3	3	4	4	4	4	4	4	3	3	3	4	4	3	3	3	3	3	3	3	3	3	3	3	3	3	3	3	3	5	3	5
8	2	18	Bachelor degree or associate degree	Chemistry	0	0	10	3.47368	3.25	3	3.5	4	3	3	3	3	3	3	3	4	4	4	4	4	4	3	3	3	4	4	3	3	3	3	3	3	3	3	3	3	3	3	3	3	3	3	5	3	5
2	1	22	Bachelor degree or associate degree	Financial Management	0	0	10	3.57895	3.75	3.8125	3.6875	3	3	3	3	3	4	3	3	4	4	4	4	4	4	4	4	3	4	4	4	3	4	4	3	4	4	3	4	5	4	4	4	4	3	4	4	4	3
2	2	22	Bachelor degree or associate degree	Chemistry	0	0	10	3.57895	3.75	3.8125	3.6875	3	3	3	3	3	4	3	3	4	4	4	4	4	4	4	4	3	4	4	4	3	4	4	3	4	4	3	4	5	4	4	4	4	3	4	4	4	3
2	1	22	Bachelor degree or associate degree	Automation	0	0	10	3.57895	3.75	3.8125	3.6875	3	3	3	3	3	4	3	3	4	4	4	4	4	4	4	4	3	4	4	4	3	4	4	3	4	4	3	4	5	4	4	4	4	3	4	4	4	3
2	1	22	Bachelor degree or associate degree	Automation	0	0	10	3.57895	3.75	3.8125	3.6875	3	3	3	3	3	4	3	3	4	4	4	4	4	4	4	4	3	4	4	4	3	4	4	3	4	4	3	4	5	4	4	4	4	3	4	4	4	3
9	2	22	Bachelor degree or associate degree	Communication	0	0	20	3.89474	3.21875	3.0625	3.375	4	4	3	4	4	4	3	4	4	4	4	4	4	4	4	4	4	4	4	3	3	2	3	3	4	4	3	2	4	4	3	3	3	2	3	3	3	5
9	2	22	Bachelor degree or associate degree	Chemistry	0	0	20	3.89474	3.21875	3.0625	3.375	4	4	3	4	4	4	3	4	4	4	4	4	4	4	4	4	4	4	4	3	3	2	3	3	4	4	3	2	4	4	3	3	3	2	3	3	3	5
4	2	22	Bachelor degree or associate degree	Industrial and Business Management	0	0	25	4.10526	3.21875	3.4375	3	4	4	4	4	4	4	3	4	5	4	5	5	4	4	4	4	4	4	4	3	3	5	1	3	3	3	4	4	4	4	4	4	4	3	3	3	4	5
4	2	22	Bachelor degree or associate degree	Chemistry	0	0	25	4.10526	3.21875	3.4375	3	4	4	4	4	4	4	3	4	5	4	5	5	4	4	4	4	4	4	4	3	3	5	1	3	3	3	4	4	4	4	4	4	4	3	3	3	4	5
20	2	18	Bachelor degree or associate degree	Master of Public Administration	1	0	40	3.47368	3.34375	3.0625	3.625	3	3	3	3	3	4	2	4	4	4	4	5	3	4	4	3	3	3	4	2	4	3	3	4	2	4	2	2	2	3	4	4	2	4	4	4	4	5
11	2	18	Bachelor degree or associate degree	Clinical Medicine	1	0	50	4	3.84375	3	4.6875	4	4	4	4	4	4	4	4	4	4	4	4	4	4	4	4	4	4	4	3	3	3	3	3	3	3	3	3	3	3	3	3	3	3	3	5	5	5
17	2	24	Bachelor degree or associate degree	Computer Science and Technology	1	0	20	3.47368	3.4375	3.375	3.5	2	3	3	3	3	3	3	5	5	3	4	4	3	3	5	5	3	3	3	3	4	3	3	4	4	4	3	3	4	3	4	4	3	2	3	3	4	4
6	2	21	High School or Technical School	Chemistry	1	0	40	3.73684	3.46875	3.5	3.4375	3	4	4	3	4	4	4	3	4	3	4	4	4	4	4	4	4	3	4	4	5	1	1	4	1	5	5	4	1	5	4	5	4	3	4	4	5	4
16	2	21	Bachelor degree or associate degree	Hospitality Management	1	0	90	4.52632	3.5	3.4375	3.5625	5	4	5	4	5	4	5	4	5	4	5	4	5	4	5	4	5	5	4	3	4	4	3	3	3	3	4	4	3	4	3	4	3	3	4	4	3	4
1	2	18	Bachelor degree or associate degree	Green Chemical and Biomedical Specialty	1	0	90	4.52632	3.09375	3.1875	3	5	4	5	4	5	4	5	4	5	4	5	4	5	4	5	4	5	5	4	4	4	4	3	3	3	3	3	3	3	3	3	3	3	3	3	3	3	3
1	1	18	Bachelor degree or associate degree	Chemistry	1	0	90	4.52632	3.09375	3.1875	3	5	4	5	4	5	4	5	4	5	4	5	4	5	4	5	4	5	5	4	4	4	4	3	3	3	3	3	3	3	3	3	3	3	3	3	3	3	3
1	1	18	Bachelor degree or associate degree	Chemistry	1	0	90	4.52632	3.09375	3.1875	3	4	4	4	4	4	4	5	5	5	5	5	5	5	4	5	4	5	5	4	4	4	4	3	3	3	3	3	3	3	3	3	3	3	3	3	3	3	3
9	2	20	Bachelor degree or associate degree	Chemical Engineering and Technology	1	0	9	3.47368	3.71875	3.625	3.8125	3	3	3	3	3	3	3	3	4	3	3	5	3	4	4	4	4	4	4	4	4	4	3	4	4	4	3	3	4	3	4	3	4	3	4	4	4	4
10	2	20	Bachelor degree or associate degree	Biological Engineering	1	0	20	3.68421	3.40625	3.4375	3.375	4	4	3	4	4	4	3	3	3	3	4	4	4	4	3	4	4	4	4	4	4	3	3	4	1	3	4	4	4	4	4	4	3	3	3	3	4	4
10	1	20	Bachelor degree or associate degree	Chemistry	1	0	20	3.68421	3.40625	3.4375	3.375	4	4	3	4	4	4	3	3	3	3	4	4	4	4	3	4	4	4	4	4	4	3	3	4	1	3	4	4	4	4	4	4	3	3	3	3	4	4
10	1	20	Bachelor degree or associate degree	Chemistry	1	0	20	3.68421	3.40625	3.4375	3.375	3	3	3	3	3	4	4	4	4	4	4	4	4	4	3	4	4	4	4	4	4	3	3	4	1	3	4	4	4	4	4	4	3	3	3	3	4	4
21	2	20	Bachelor degree or associate degree	Chinese Language and Literature	1	0	40	3.78947	2.5	1	4	4	4	4	4	4	4	3	3	4	4	2	4	4	4	4	4	4	4	4	1	1	1	1	1	1	1	1	1	1	1	1	1	1	1	1	4	4	4
3	2	20	High School or Technical School	Industrial and Business Management	1	0	90	5	2.875	1	4.75	5	5	5	5	5	5	5	5	5	5	5	5	5	5	5	5	5	5	5	1	1	1	1	1	1	1	1	1	1	1	1	1	1	1	1	5	5	5
3	1	20	Bachelor degree or associate degree	Chemistry	1	0	90	5	2.875	1	4.75	5	5	5	5	5	5	5	5	5	5	5	5	5	5	5	5	5	5	5	1	1	1	1	1	1	1	1	1	1	1	1	1	1	1	1	5	5	5
3	1	20	Bachelor degree or associate degree	Chemistry	1	0	90	5	2.875	1	4.75	5	5	5	5	5	5	5	5	5	5	5	5	5	5	5	5	5	5	5	1	1	1	1	1	1	1	1	1	1	1	1	1	1	1	1	5	5	5
15	2	21	Bachelor degree or associate degree	Pedagogy	1	0	30	3.78947	4	3.9375	4.0625	3	3	3	4	3	4	4	4	4	4	5	4	4	4	3	4	4	4	4	4	4	4	4	4	2	4	4	4	4	4	4	5	4	4	4	4	4	4
13	2	18	Bachelor degree or associate degree	Master of Public Administration	1	0	10	3.52632	3	3	3	3	3	3	3	3	4	2	2	4	4	4	4	4	4	4	4	4	4	4	3	3	3	3	3	3	3	3	3	3	3	3	3	3	3	3	3	3	3
15	1	21	Bachelor degree or associate degree	Chemistry	1	0	30	3.84211	4	3.9375	4.0625	3	3	3	4	4	4	4	4	4	4	4	4	4	4	4	4	4	4	4	4	4	4	4	4	2	4	4	4	4	4	4	5	4	4	4	4	4	4
15	1	21	Bachelor degree or associate degree	Chemistry	1	0	30	3.84211	4	3.9375	4.0625	4	4	3	3	3	4	4	4	4	4	4	4	4	4	4	4	4	4	4	4	4	4	4	4	2	4	4	4	4	4	4	5	4	4	4	4	4	4
5	2	20	High School or Technical School	Chemical Biology	1	0	40	4	3.5625	3.6875	3.4375	4	4	4	4	4	4	4	4	4	4	4	4	4	4	4	4	4	4	4	3	3	4	3	3	3	4	4	4	4	4	4	4	4	4	4	3	3	5
5	1	20	Bachelor degree or associate degree	Chemistry	1	0	40	4	3.5625	3.6875	3.4375	4	4	4	4	4	4	4	4	4	4	4	4	4	4	4	4	4	4	4	3	3	4	3	3	3	4	4	4	4	4	4	4	4	4	4	3	3	5
5	1	20	Bachelor degree or associate degree	Chemistry	1	0	40	4	3.5625	3.6875	3.4375	4	4	4	4	4	4	4	4	4	4	4	4	4	4	4	4	4	4	4	3	3	4	3	3	3	4	4	4	4	4	4	4	4	4	4	3	3	5
12	2	19	Bachelor degree or associate degree	Clinical Medicine	1	0	10	3.63158	3.5625	3.75	3.375	4	3	3	3	4	4	3	3	4	3	3	4	4	4	4	4	4	4	4	5	5	4	1	4	1	4	5	4	3	3	4	4	4	4	5	4	2	4
8	2	20	High School or Technical School	Pharmaceutical Engineering	1	0	0	3.73684	3.3125	3.1875	3.4375	4	4	4	4	4	4	3	3	4	4	3	3	4	4	4	4	3	4	4	4	4	3	3	4	2	3	3	3	3	4	3	3	3	3	3	3	3	4
14	2	19	High School or Technical School	Preventive Medicine	1	0	40	4.52632	3.78125	4	3.5625	5	4	5	4	5	4	5	4	5	4	5	4	5	4	5	4	5	5	4	4	4	4	4	4	4	4	4	4	4	4	4	4	4	4	4	4	4	4
2	2	19	Bachelor degree or associate degree	Chemical Biology	1	0	10	4	3.9375	3.875	4	4	4	4	4	4	4	4	4	4	4	4	4	4	4	4	4	4	4	4	4	4	3	4	4	4	4	3	4	4	4	4	4	4	4	4	4	4	4
4	2	20	High School or Technical School	Master of Public Administration	1	0	20	4.05263	3.59375	3.5625	3.625	4	4	4	4	4	4	4	5	4	4	4	4	4	4	4	4	4	4	4	4	4	4	3	3	1	4	3	3	3	4	5	3	4	5	4	4	4	4
22	2	20	High School or Technical School	Financial Mathematics	1	0	20	4.84211	3.375	2.5	4.25	5	5	4	4	5	5	4	5	5	5	5	5	5	5	5	5	5	5	5	2	1	5	1	4	5	4	4	1	4	1	1	1	1	1	4	5	5	5
19	2	19	High School or Technical School	Art	1	0	10	5	3.15625	3	3.3125	5	5	5	5	5	5	5	5	5	5	5	5	5	5	5	5	5	5	5	3	3	3	3	3	3	3	3	3	3	3	3	3	3	3	3	4	4	5
7	2	21	Bachelor degree or associate degree	Applied Chemistry	1	0	0	4.47368	2.34375	1.9375	2.75	4	4	5	5	5	5	4	5	4	2	4	5	4	5	5	4	5	5	5	4	1	1	1	5	1	3	1	1	1	3	5	1	1	1	1	4	5	5
18	2	23	Bachelor degree or associate degree	Radio and Television Studies	1	0	-5	4.52632	2.65625	1.5625	3.75	5	4	5	4	5	4	5	4	5	4	5	4	5	4	5	4	5	5	4	2	2	1	2	2	2	2	2	1	2	1	2	1	1	1	1	3	3	3
10	1	18	Bachelor degree or associate degree	Applied Chemistry	0	1	5	2	3.1875	2.25	4.125	2	2	2	2	2	2	2	2	2	2	2	2	2	2	2	2	2	2	2	3	3	1	1	2	1	2	2	1	3	3	3	3	2	2	4	3	5	5
9	2	22	Bachelor degree or associate degree	Communication	0	1	10	2.47368	3.21875	3.0625	3.375	2	3	2	3	2	3	2	3	2	3	2	3	2	3	2	3	2	2	3	3	3	2	3	3	4	4	3	2	4	4	3	3	3	2	3	3	3	5
9	2	22	Bachelor degree or associate degree	Applied Chemistry	0	1	10	2.57895	3.21875	3.0625	3.375	3	3	2	3	2	3	3	3	2	3	2	3	2	3	2	3	2	2	3	3	3	2	3	3	4	4	3	2	4	4	3	3	3	2	3	3	3	5
7	1	19	Bachelor degree or associate degree	Applied Statistics	0	1	10	3	2.96875	2.9375	3	3	3	3	3	3	3	3	3	3	3	3	3	3	3	3	3	3	3	3	3	3	1	4	3	3	3	3	3	3	3	3	3	3	3	3	3	3	3
7	2	22	Bachelor degree or associate degree	Applied Chemistry	0	1	10	3	2.96875	2.9375	3	3	3	3	3	3	3	3	3	3	3	3	3	3	3	3	3	3	3	3	3	3	1	4	3	3	3	3	3	3	3	3	3	3	3	3	3	3	3
10	2	18	Bachelor degree or associate degree	Applied Chemistry	0	1	5	3	3.1875	2.25	4.125	3	3	3	3	3	3	3	3	3	3	3	3	3	3	3	3	3	3	3	3	3	1	1	2	1	2	2	1	3	3	3	3	2	2	4	3	5	5
13	1	22	High School or Technical School	Network Engineering	0	1	0	2	4.71875	4.8125	4.625	2	2	2	2	2	2	2	2	2	2	2	2	2	2	2	2	2	2	2	5	5	5	5	5	2	5	5	5	5	5	5	5	5	5	5	5	5	5
13	2	22	Bachelor degree or associate degree	Applied Chemistry	0	1	0	2	4.71875	4.8125	4.625	2	2	2	2	2	2	2	2	2	2	2	2	2	2	2	2	2	2	2	5	5	5	5	5	2	5	5	5	5	5	5	5	5	5	5	5	5	5
5	2	23	Bachelor degree or associate degree	Information Management and System	0	1	0	2	3.09375	2.875	3.3125	2	2	2	2	2	2	2	2	2	2	2	2	2	2	2	2	2	2	2	4	4	3	1	2	1	1	3	1	4	5	5	5	2	4	1	3	3	4
5	1	20	Bachelor degree or associate degree	Information Management and System	0	1	0	2	3.09375	2.875	3.3125	2	2	2	2	2	2	2	2	2	2	2	2	2	2	2	2	2	2	2	4	4	3	1	2	1	1	3	1	4	5	5	5	2	4	1	3	3	4
3	2	26	Bachelor degree or associate degree	Applied Chemistry	0	1	5	3.10526	3	2.9375	3.0625	3	3	2	3	2	4	2	4	2	4	2	4	4	3	2	4	4	4	3	2	3	2	4	2	4	2	4	2	4	2	4	2	4	2	4	2	4	2
3	1	26	Graduate degree	Chemistry	0	1	1	3.10526	3	2.9375	3.0625	2	3	2	4	2	4	2	4	2	4	2	4	4	3	2	4	4	4	3	2	3	2	4	2	4	2	4	2	4	2	4	2	4	2	4	2	4	2
6	2	20	Bachelor degree or associate degree	Information Management and System	0	1	0	2.05263	4	4	4	2	2	2	2	2	2	2	2	2	2	2	2	2	2	2	2	2	3	2	4	4	4	4	4	4	4	4	4	4	4	4	4	4	4	4	4	4	4
6	1	20	Bachelor degree or associate degree	Information Management and System	0	1	0	2.05263	4	4	4	2	2	2	2	2	2	2	2	2	2	2	2	2	2	2	2	2	3	2	4	4	4	4	4	4	4	4	4	4	4	4	4	4	4	4	4	4	4
1	2	22	Bachelor degree or associate degree	Accounting	0	1	0	2.10526	4	4	4	2	2	3	3	2	2	2	2	2	2	2	2	2	2	2	2	2	2	2	4	4	4	4	4	4	4	4	4	4	4	4	4	4	4	4	4	4	4
1	2	22	Bachelor degree or associate degree	Applied Chemistry	0	1	0	2.10526	4	4	4	2	2	3	3	2	2	2	2	2	2	2	2	2	2	2	2	2	2	2	4	4	4	4	4	4	4	4	4	4	4	4	4	4	4	4	4	4	4
11	1	19	High School or Technical School	Automation	0	1	5	3.31579	3.1875	2.8125	3.5625	3	3	2	4	3	4	2	2	4	3	4	3	4	4	4	4	3	4	3	4	4	2	3	2	3	4	4	2	2	3	2	2	2	2	4	3	3	5
2	1	22	Bachelor degree or associate degree	Financial management	0	1	0	2.15789	3.75	3.8125	3.6875	2	2	3	3	3	2	2	2	2	2	2	2	2	2	2	2	2	2	2	4	3	4	4	3	4	4	3	4	5	4	4	4	4	3	4	4	4	3
2	2	22	Bachelor degree or associate degree	Applied Chemistry	0	1	0	2.15789	3.75	3.8125	3.6875	2	2	3	3	3	2	2	2	2	2	2	2	2	2	2	2	2	2	2	4	3	4	4	3	4	4	3	4	5	4	4	4	4	3	4	4	4	3
4	2	22	Bachelor degree or associate degree	Industrial and Business Management	0	1	0	2.47368	3.21875	3.4375	3	2	3	2	3	2	3	2	3	2	3	2	3	2	3	2	3	2	2	3	3	3	5	1	3	3	3	4	4	4	4	4	4	4	3	3	3	4	5
4	2	22	Bachelor degree or associate degree	Applied Chemistry	0	1	0	2.47368	3.21875	3.4375	3	2	3	2	3	2	3	2	3	2	3	2	3	2	3	2	3	2	2	3	3	3	5	1	3	3	3	4	4	4	4	4	4	4	3	3	3	4	5
4	1	22	Bachelor degree or associate degree	Applied Chemistry	0	1	0	2.63158	3.21875	3.4375	3	3	3	3	3	2	3	2	3	2	3	2	3	3	3	2	3	2	2	3	3	3	5	1	3	3	3	4	4	4	4	4	4	4	3	3	3	4	5
11	2	22	Bachelor degree or associate degree	Applied Chemistry	0	1	0	2.89474	3.1875	2.8125	3.5625	3	3	3	3	3	3	2	2	3	3	3	3	3	3	3	3	3	3	3	4	4	2	3	2	3	4	4	2	2	3	2	2	2	2	4	3	3	5
12	1	18	High School or Technical School	Automation	0	1	0	3	3.53125	3	4.0625	3	3	3	3	3	3	3	3	3	3	3	3	3	3	3	3	3	3	3	3	3	3	3	3	3	3	3	3	3	3	3	3	3	3	3	3	5	5
5	1	19	High School or Technical School	Information Management and System	0	1	0	3	3.09375	2.875	3.3125	3	3	3	3	3	3	3	3	3	3	3	3	3	3	3	3	3	3	3	4	4	3	1	2	1	1	3	1	4	5	5	5	2	4	1	3	3	4
12	2	22	Bachelor degree or associate degree	Applied Chemistry	0	1	0	3	3.53125	3	4.0625	3	3	3	3	3	3	3	3	3	3	3	3	3	3	3	3	3	3	3	3	3	3	3	3	3	3	3	3	3	3	3	3	3	3	3	3	5	5
6	2	23	Bachelor degree or associate degree	Information Management and System	0	1	0	3	4	4	4	3	3	3	3	3	3	3	3	3	3	3	3	3	3	3	3	3	3	3	4	4	4	4	4	4	4	4	4	4	4	4	4	4	4	4	4	4	4
8	2	23	Bachelor degree or associate degree	Information Management and System	0	1	0	3	3.25	3	3.5	3	3	3	3	3	3	3	3	3	3	3	3	3	3	3	3	3	3	3	3	3	3	3	3	3	3	3	3	3	3	3	3	3	3	3	5	3	5
12	1	20	Bachelor degree or associate degree	Applied Chemistry	0	1	0	3	3.53125	3	4.0625	3	3	3	3	3	3	3	3	3	3	3	3	3	3	3	3	3	3	3	3	3	3	3	3	3	3	3	3	3	3	3	3	3	3	3	3	5	5
8	2	20	Bachelor degree or associate degree	Information Management and System	0	1	0	3	3.25	3	3.5	3	3	3	3	3	3	3	3	3	3	3	3	3	3	3	3	3	3	3	3	3	3	3	3	3	3	3	3	3	3	3	3	3	3	3	5	3	5
6	1	19	High School or Technical School	Network Engineering	0	1	0	3.31579	4	4	4	4	4	3	4	4	4	3	3	4	3	3	2	3	3	3	3	3	4	3	4	4	4	4	4	4	4	4	4	4	4	4	4	4	4	4	4	4	4
8	1	18	Bachelor degree or associate degree	Microelectronics Science and Engineering	0	1	0	3.42105	3.25	3	3.5	3	3	3	3	3	3	3	3	4	4	4	4	4	4	3	3	3	4	4	3	3	3	3	3	3	3	3	3	3	3	3	3	3	3	3	5	3	5
18	2	23	Bachelor degree or associate degree	Radio and Television Studies	1	1	50	3.05263	2.65625	1.5625	3.75	3	3	2	3	3	4	3	3	4	4	4	5	3	3	2	2	1	3	3	2	2	1	2	2	2	2	2	1	2	1	2	1	1	1	1	3	3	3
20	2	18	Bachelor degree or associate degree	Master of Public Administration	1	1	50	3.47368	3.34375	3.0625	3.625	3	3	3	3	3	4	2	4	4	4	4	5	3	4	4	3	3	3	4	2	4	3	3	4	2	4	2	2	2	3	4	4	2	4	4	4	4	5
17	2	24	Bachelor degree or associate degree	Computer Science and Technology	1	1	40	3.47368	3.4375	3.375	3.5	2	3	3	3	3	3	3	5	5	3	4	4	3	3	5	5	3	3	3	3	4	3	3	4	4	4	3	3	4	3	4	4	3	2	3	3	4	4
13	2	18	Bachelor degree or associate degree	Master of Public Administration	1	1	50	3.52632	3	3	3	3	3	3	3	3	4	2	2	4	4	4	4	4	4	4	4	4	4	4	3	3	3	3	3	3	3	3	3	3	3	3	3	3	3	3	3	3	3
16	2	21	Bachelor degree or associate degree	Hospitality Management	1	1	20	3.31579	3.5	3.4375	3.5625	3	3	4	3	3	3	3	3	4	3	3	4	3	4	3	4	3	3	4	3	4	4	3	3	3	3	4	4	3	4	3	4	3	3	4	4	3	4
1	2	18	Bachelor degree or associate degree	Green Chemical and Biomedical Specialty	1	1	25	3.36842	3.09375	3.1875	3	3	3	3	3	3	3	3	3	3	3	3	3	4	4	4	4	4	4	4	4	4	4	3	3	3	3	3	3	3	3	3	3	3	3	3	3	3	3
6	2	21	High School or Technical School	Chemistry	1	1	50	3.73684	3.46875	3.5	3.4375	3	4	4	3	4	4	4	3	4	3	4	4	4	4	4	4	4	3	4	4	5	1	1	4	1	5	5	4	1	5	4	5	4	3	4	4	5	4
10	1	22	Bachelor degree or associate degree	Chemistry	1	1	50	3.73684	3.40625	3.4375	3.375	4	4	3	4	4	4	3	3	3	3	4	4	4	4	4	4	4	4	4	4	4	3	3	4	1	3	4	4	4	4	4	4	3	3	3	3	4	4
6	1	21	Bachelor degree or associate degree	Chemistry	1	1	50	3.73684	3.46875	3.5	3.4375	3	4	4	3	4	4	4	3	4	3	4	4	4	4	4	4	4	3	4	4	5	1	1	4	1	5	5	4	1	5	4	5	4	3	4	4	5	4
10	1	22	Bachelor degree or associate degree	Chemistry	1	1	50	3.73684	3.40625	3.4375	3.375	3	3	3	3	3	4	4	4	4	4	4	4	4	4	4	4	4	4	4	4	4	3	3	4	1	3	4	4	4	4	4	4	3	3	3	3	4	4
6	1	21	Bachelor degree or associate degree	Chemistry	1	1	50	3.73684	3.46875	3.5	3.4375	3	3	3	3	4	4	4	4	4	4	4	4	4	4	4	4	4	3	4	4	5	1	1	4	1	5	5	4	1	5	4	5	4	3	4	4	5	4
10	2	20	Bachelor degree or associate degree	Biological Engineering	1	1	30	3.68421	3.40625	3.4375	3.375	4	4	3	4	4	4	3	3	3	3	4	4	4	4	3	4	4	4	4	4	4	3	3	4	1	3	4	4	4	4	4	4	3	3	3	3	4	4
21	2	20	Bachelor degree or associate degree	Chinese Language and Literature	1	1	50	3.78947	2.5	1	4	4	4	4	4	4	4	3	3	4	4	2	4	4	4	4	4	4	4	4	1	1	1	1	1	1	1	1	1	1	1	1	1	1	1	1	4	4	4
15	2	21	Bachelor degree or associate degree	Pedagogy	1	1	50	3.78947	4	3.9375	4.0625	3	3	3	4	3	4	4	4	4	4	5	4	4	4	3	4	4	4	4	4	4	4	4	4	2	4	4	4	4	4	4	5	4	4	4	4	4	4
5	2	20	High School or Technical School	Chemical Biology	1	1	50	4	3.5625	3.6875	3.4375	4	4	4	4	4	4	4	4	4	4	4	4	4	4	4	4	4	4	4	3	3	4	3	3	3	4	4	4	4	4	4	4	4	4	4	3	3	5
11	2	18	Bachelor degree or associate degree	Clinical Medicine	1	1	50	4	3.84375	3	4.6875	4	4	4	4	4	4	4	4	4	4	4	4	4	4	4	4	4	4	4	3	3	3	3	3	3	3	3	3	3	3	3	3	3	3	3	5	5	5
5	1	22	Bachelor degree or associate degree	Chemistry	1	1	50	4	3.5625	3.6875	3.4375	4	4	4	4	4	4	4	4	4	4	4	4	4	4	4	4	4	4	4	3	3	4	3	3	3	4	4	4	4	4	4	4	4	4	4	3	3	5
11	1	22	Bachelor degree or associate degree	Chemistry	1	1	50	4	3.84375	3	4.6875	4	4	4	4	4	4	4	4	4	4	4	4	4	4	4	4	4	4	4	3	3	3	3	3	3	3	3	3	3	3	3	3	3	3	3	5	5	5
5	1	23	Bachelor degree or associate degree	Chemistry	1	1	50	4	3.5625	3.6875	3.4375	4	4	4	4	4	4	4	4	4	4	4	4	4	4	4	4	4	4	4	3	3	4	3	3	3	4	4	4	4	4	4	4	4	4	4	3	3	5
5	1	22	Bachelor degree or associate degree	Chemistry	1	1	50	4	3.5625	3.6875	3.4375	4	4	4	4	4	4	4	4	4	4	4	4	4	4	4	4	4	4	4	3	3	4	3	3	3	4	4	4	4	4	4	4	4	4	4	3	3	5
11	1	22	Bachelor degree or associate degree	Chemistry	1	1	50	4	3.84375	3	4.6875	4	4	4	4	4	4	4	4	4	4	4	4	4	4	4	4	4	4	4	3	3	3	3	3	3	3	3	3	3	3	3	3	3	3	3	5	5	5
5	1	23	Bachelor degree or associate degree	Chemistry	1	1	50	4	3.5625	3.6875	3.4375	4	4	4	4	4	4	4	4	4	4	4	4	4	4	4	4	4	4	4	3	3	4	3	3	3	4	4	4	4	4	4	4	4	4	4	3	3	5
19	2	19	High School or Technical School	Art	1	1	0	2.36842	3.15625	3	3.3125	3	3	2	3	2	2	2	2	1	2	2	1	3	3	1	3	4	3	3	3	3	3	3	3	3	3	3	3	3	3	3	3	3	3	3	4	4	5
14	2	19	High School or Technical School	Preventive Medicine	1	1	0	3.15789	3.78125	4	3.5625	4	3	3	4	3	4	3	3	3	3	3	3	3	3	3	3	3	3	3	4	4	4	4	4	4	4	4	4	4	4	4	4	4	4	4	4	4	4
8	2	20	High School or Technical School	Pharmaceutical Engineering	1	1	10	3.73684	3.3125	3.1875	3.4375	4	4	4	4	4	4	3	3	4	4	3	3	4	4	4	4	3	4	4	4	4	3	3	4	2	3	3	3	3	4	3	3	3	3	3	3	3	4
9	2	20	Bachelor degree or associate degree	Chemical Engineering and Technology	1	1	0	3.47368	3.71875	3.625	3.8125	3	3	3	3	3	3	3	3	4	3	3	5	3	4	4	4	4	4	4	4	4	4	3	4	4	4	3	3	4	3	4	3	4	3	4	4	4	4
2	2	19	Bachelor degree or associate degree	Chemical Biology	1	1	10	4	3.9375	3.875	4	4	4	4	4	4	4	4	4	4	4	4	4	4	4	4	4	4	4	4	4	4	3	4	4	4	4	3	4	4	4	4	4	4	4	4	4	4	4
12	2	19	Bachelor degree or associate degree	Clinical Medicine	1	1	0	3.63158	3.5625	3.75	3.375	4	3	3	3	4	4	3	3	4	3	3	4	4	4	4	4	4	4	4	5	5	4	1	4	1	4	5	4	3	3	4	4	4	4	5	4	2	4
22	2	20	High School or Technical School	Financial Mathematics	1	1	25	4.84211	3.375	2.5	4.25	5	5	4	4	5	5	4	5	5	5	5	5	5	5	5	5	5	5	5	2	1	5	1	4	5	4	4	1	4	1	1	1	1	1	4	5	5	5
7	2	21	Bachelor degree or associate degree	Applied Chemistry	1	1	15	4.47368	2.34375	1.9375	2.75	4	4	5	5	5	5	4	5	4	2	4	5	4	5	5	4	5	5	5	4	1	1	1	5	1	3	1	1	1	3	5	1	1	1	1	4	5	5
3	2	20	High School or Technical School	Industrial and Business Management	1	1	25	5	2.875	1	4.75	5	5	5	5	5	5	5	5	5	5	5	5	5	5	5	5	5	5	5	1	1	1	1	1	1	1	1	1	1	1	1	1	1	1	1	5	5	5
4	2	20	High School or Technical School	Master of Public Administration	1	1	0	4.05263	3.59375	3.5625	3.625	4	4	4	4	4	4	4	5	4	4	4	4	4	4	4	4	4	4	4	4	4	4	3	3	1	4	3	3	3	4	5	3	4	5	4	4	4	4
[truncated: 13 more columns]

## Sheet:  Descriptive statistics of four
	Immorality human group		Immorality robot group		Morality human group		Morality robot group
	Sharing behaviors	Reputation concern	Sharing behaviors	Reputation concern	Sharing behaviors	Reputation concern	Sharing behaviors	Reputation concern
	30	3	5	2	40	3.47368	50	3.05263
	30	3	10	2.47368	50	4	50	3.47368
	50	3.10526	10	2.57895	20	3.47368	40	3.47368
	50	3.10526	10	3	40	3.73684	50	3.52632
	50	3.10526	10	3	90	4.52632	20	3.31579
	50	3.31579	5	3	90	4.52632	25	3.36842
	50	3.31579	0	2	90	4.52632	50	3.73684
	25	3.31579	0	2	90	4.52632	50	3.73684
	25	3.31579	0	2	9	3.47368	50	3.73684
	50	3.63158	0	2	20	3.68421	50	3.73684
	50	3.63158	5	3.10526	20	3.68421	50	3.73684
	50	3.89474	1	3.10526	20	3.68421	30	3.68421
	50	3.89474	0	2.05263	40	3.78947	50	3.78947
	25	3.68421	0	2.05263	90	5	50	3.78947
	25	3.68421	0	2.10526	90	5	50	4
	50	4	0	2.10526	90	5	50	4
	50	4	5	3.31579	30	3.78947	50	4
	50	4	0	2.15789	10	3.52632	50	4
	50	4	0	2.15789	30	3.84211	50	4
	50	4	0	2.47368	30	3.84211	50	4
	50	4	0	2.47368	40	4	50	4
	50	4	0	2.63158	40	4	50	4
	10	3.47368	0	2.89474	40	4	0	2.36842
	10	3.47368	0	3	10	3.63158	0	3.15789
	10	3.57895	0	3	0	3.73684	10	3.73684
	10	3.57895	0	3	40	4.52632	0	3.47368
	10	3.57895	0	3	10	4	10	4
	10	3.57895	0	3	20	4.05263	0	3.63158
	20	3.89474	0	3	20	4.84211	25	4.84211
	20	3.89474	0	3	10	5	15	4.47368
	25	4.10526	0	3.31579	0	4.47368	25	5
	25	4.10526	0	3.42105	-5	4.52632	0	4.05263
Mean	34.6875	3.63322	1.90625	2.63816	37.9375	4.12171	34.375	3.77796
SD	16.247	0.343238	3.46734	0.473639	30.593	0.496602	19.6751	0.477277
